# Supplementary material for: Luminescent gold–poly(thiophene) nanoaggregates prepared by one-step oxidative polymerization
Source: Royal Society of Chemistry journal article supplement (doi:10.1039/c0jm01793k), 2010-01-01

## Supporting Information (SI)

### Luminescent Gold-Poly(thiophene) Nanoaggregates Prepared by One-step Oxidative Polymerization

Yeon Jae Jung, Patakamuri Govindaiah, Tae-Joon Park, Sun Jong Lee, Du Yeol Ryu, In Woo Cheong\* and Jung Hyun Kim\*

**\* Corresponding Authors:**

- Jung Hyun Kim, Ph.D., Professor, E-mail: [jayhkim@yonsei.ac.kr](mailto:jayhkim@yonsei.ac.kr)
- In Woo Cheong, Ph.D., E-mail: [inwoo@knu.ac.kr](mailto:inwoo@knu.ac.kr)

Figure S1. XPS spectra for Au-PTh nanoaggregates on the cleaned glass substrate: (a) whole and (b) Au 4f peaks.

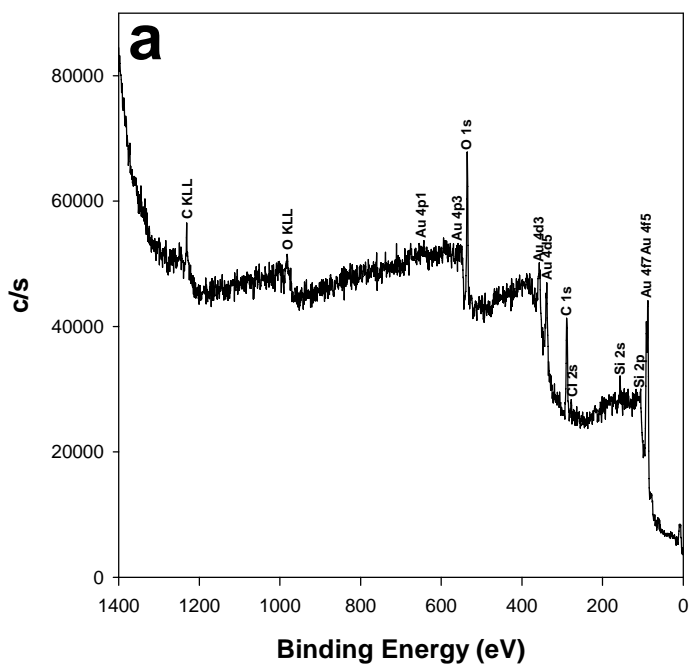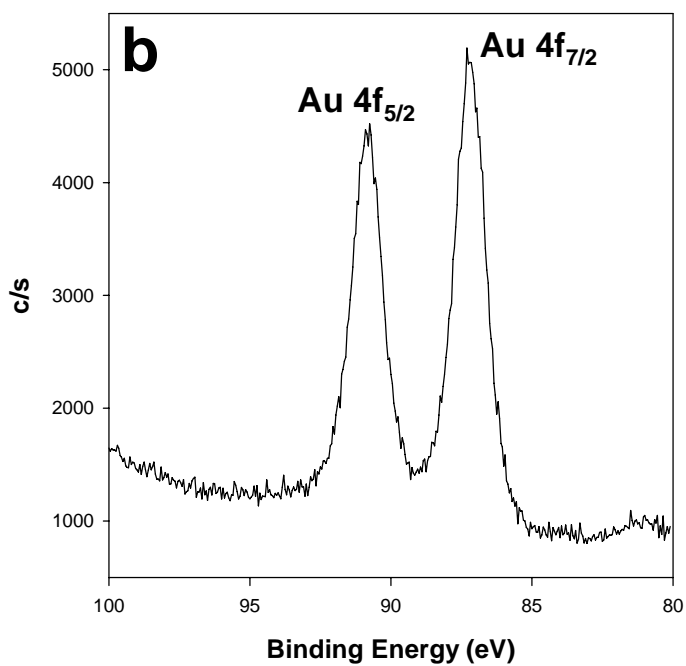

Figure S2. EDS spectrum of Au-PTh nanoaggregates.

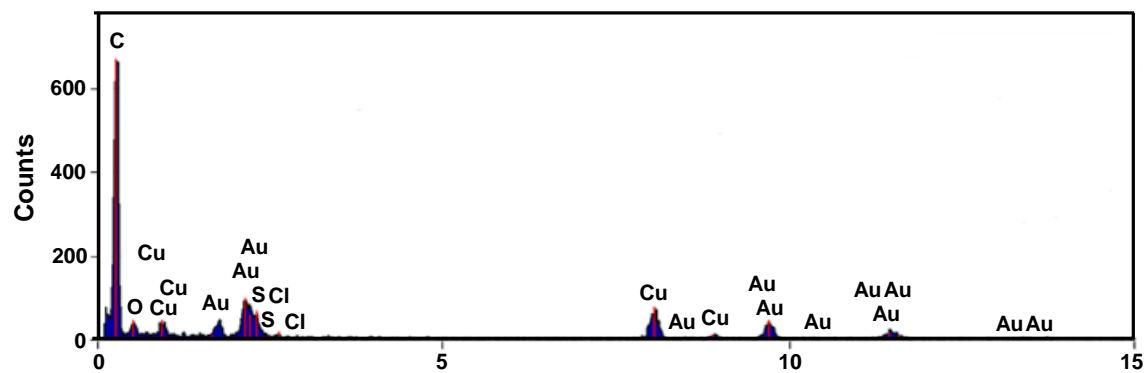

Figure S3. Wide-angle XRD patterns of (a) PTh NPs, (b) Au NPs, and (c) Au-PTh nanoaggregates.

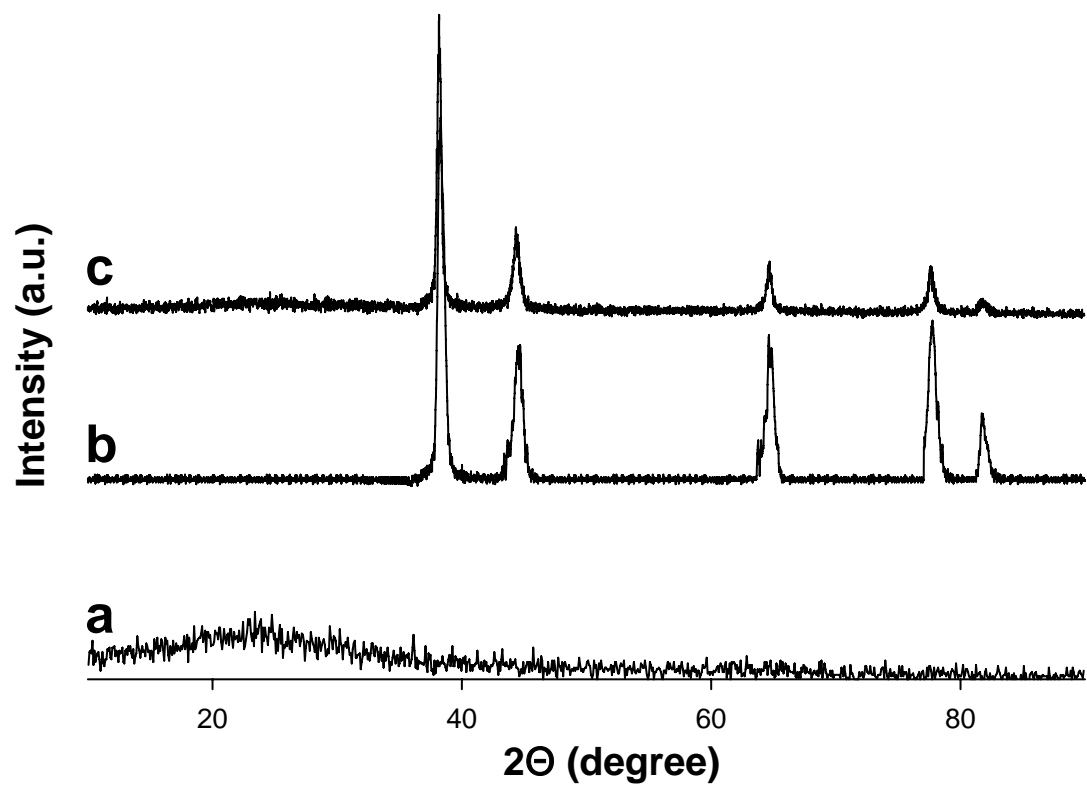

Figure S4. PL spectra of pristine PTh NPs and Au-PTh nanoaggregates in the solid state.  
(excitation wavelength : 488 nm).

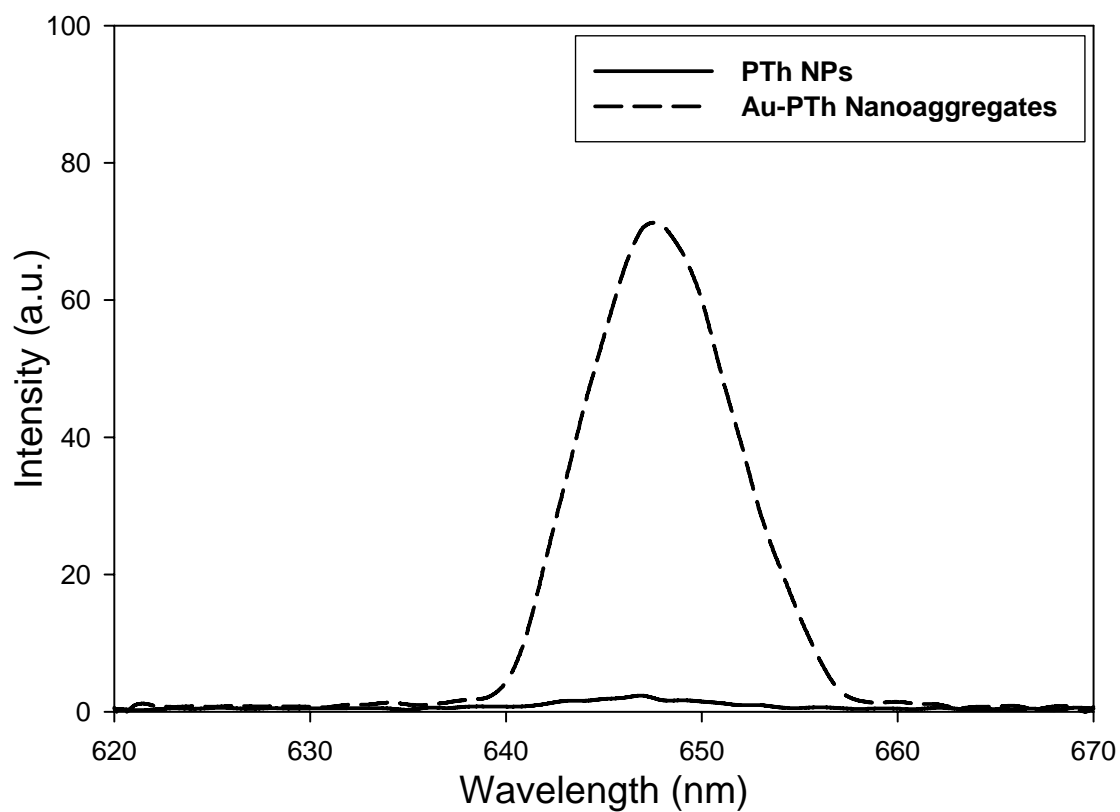

Figure S5. CLSM image of Au-PTh nanoaggregates in solid state at the different excitation wavelength (405, 458, 488 and 514 nm).

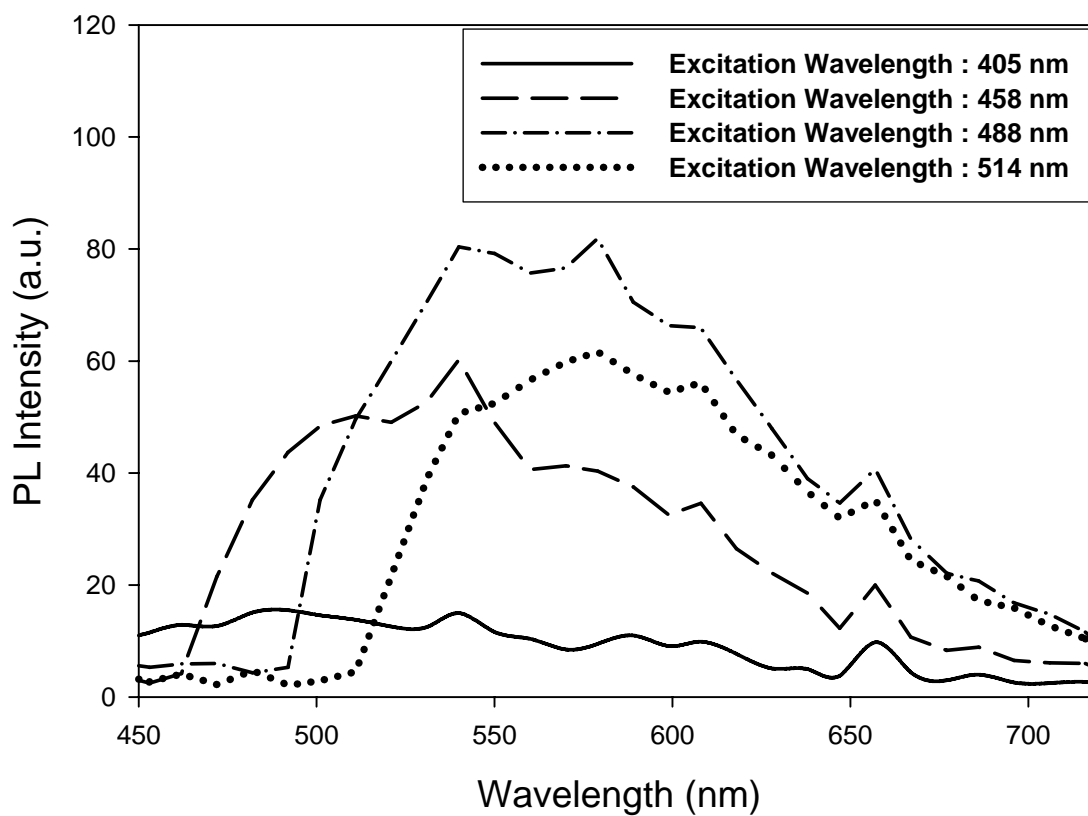

Supplement: c0jm01793k.pdf [file c0jm01793k.pdf]
